# Supplementary material
Source: HighWire-hosted journal article supplement (https://bmjopensem.bmj.com/content/2/1/e000086)
Supplement: inline-supplementary-material-1 [file inline-supplementary-material-1.pdf]

# Supplementary file 1 Expert feedback survey

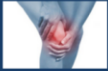

## Patient Education for Patellofemoral Pain

We would like to invite you participate in validating our not for profit endeavour to create a clear and simple information leaflet for individuals with patellofemoral pain (PFP). The primary aims of the leaflet are to educate the patient on possible causes of their pain, treatment options available, and the importance of exercise and self-management. The leaflet should complement the education provided by the treating clinician, not replace it.

### 1. What country do you work in?

### 2. What is your clinical role?

- Physiotherapist
- Physical therapist
- Athletic trainer
- Medical Doctor
- None
- Other (please specify)

### 3. How many years of clinical experience do you have?

### 4. Are you actively treating patients with patellofemoral pain?

- Yes
- No

### 5. If yes, on average, how many new patients with patellofemoral pain do you see per month?

### 6. What is your academic/research role?

- Professor
- Associate Professor
- Assistant Professor
- Post Doctoral Resarcer
- PhD candidate
- None
- Other (please specify)

### 7. Years of research experience

Next

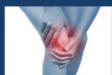

8. What are your first impressions of the education leaflet?

9. Overall, what do you like about the leaflet?

Prev

Next

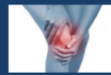

10. Are there any essential aspects related to known causes of PFP missing?

- Yes
- No

11. If yes, can you please elaborate?

12. Is there any information you disagree with?

- Yes
- No

13. If yes, can you please elaborate?

14. Are there any essential aspects of management missing?

- Yes
- No

15. If yes, can you please elaborate?

Prev

Next

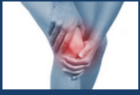

## Patient Education for Patellofemoral Pain

16. Do the figures adequately complement the information in the text?

- Yes  
 No

17. If not, how could they be improved?

18. Do you have any other suggestions for improvement of this information leaflet?

Prev

Done
