# Supplementary material
Source: HighWire-hosted journal article supplement (https://bmjopensem.bmj.com/content/2/1/e000086)
Supplement: inline-supplementary-material-2 [file inline-supplementary-material-2.pdf]

## Supplementary file 2 Patient feedback survey

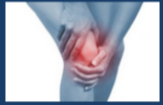

### Patient Education for Patellofemoral Pain - Patient Feedback

We would like to invite you to participate in validating our not for profit endeavour to create a clear and simple information leaflet for individuals with patellofemoral pain (PFP). The primary aims of the leaflet are to educate the patient on possible causes of their pain, treatment options available, and the importance of exercise and self-management. The leaflet should complement the education provided by your treating clinician, not replace it.

If you do not already have a copy of the leaflet, [it can be found here](#)

**1. What country do you live in?**

**2. What gender are you?**

- Male  
 Female

**3. How old are you (in years)?**

**4. What is your profession?**

**5. How long have you had knee pain (in months)?**

**6. Where did you see your therapist?**

- In a private clinic (i.e. treatment paid by health insurance or yourself)  
 In a public hospital

Next

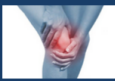

7. What are your first impressions of the education leaflet?

8. Overall, what do you like about the leaflet?

9. Do you feel that any of the sections in leaflet are too difficult to understand?

- Yes
- No

10. If yes, please indicate which sections, and any suggestions where they may be able to be improved

Prev

Next

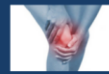

11. Do you have any important questions related to your knee pain that is not covered by the leaflet?

- Yes
- No

12. If yes, can you please elaborate?

13. Do you think the leaflet adequately explains the reasons why you may have developed knee pain?

- Yes
- No

14. If no, can you please elaborate and feel free to add suggestions on important content that you feel are missing?

15. Do you think this leaflet will help guide you to the most appropriate treatment for your knee pain?

- Yes
- No

16. If no, can you please elaborate and feel free to add suggestions on important content that you feel are missing?

Prev

Next

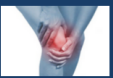

17. Do the figures adequately complement the information in the text?

Yes

No

18. If not, how could they be improved?

19. Do you have any other suggestions for improvement of this information leaflet?

20. What other resources do you think would help you and others with your knee condition manage and/or rehabilitate?

Prev

Done
